# Supplementary material for: Extracellular DNA release, quorum sensing, and PrrF1/F2 small RNAs are key players in Pseudomonas aeruginosa tobramycin-enhanced biofilm formation
Source: PubMed Central journal article supplement (PMC6533273; doi:10.1038/s41522-019-0088-3), 2019-05-23
Supplement: 41522_2019_88_MOESM2_ESM.pdf [file 41522_2019_88_MOESM2_ESM.pdf]

# Supplementary Information

## **Extracellular DNA release, quorum sensing, and PrrF1/F2 small RNAs are key players in *Pseudomonas aeruginosa* tobramycin-enhanced biofilm formation**

**Ali Tahrioui<sup>1#</sup>, Rachel Duchesne<sup>1</sup>, Emeline Bouffartigues<sup>1</sup>, Sophie Rodrigues<sup>1</sup>,  
Olivier Maillot<sup>1</sup>, Damien Tortuel<sup>1</sup>, Julie Hardouin<sup>2</sup>, Laure Taupin<sup>3</sup>, Marie-Christine  
Groleau<sup>4</sup>, Alain Dufour<sup>3</sup>, Eric Déziel<sup>4</sup>, Gerald Brenner-Weiss<sup>5</sup>, Marc Feuilloy<sup>1</sup>,  
Nicole Orange<sup>1</sup>, Olivier Lesouhaitier<sup>1</sup>, Pierre Cornelis<sup>1</sup> and Sylvie Chevalier<sup>1</sup>**

<sup>1</sup>Normandie Université, Université de Rouen Normandie, Laboratoire de Microbiologie  
Signaux et Microenvironnement, LMSM EA4312, Évreux, France

<sup>2</sup>Normandie Université, Université de Rouen Normandie, Laboratoire Polymères  
Biopolymères Surfaces, PBS, UMR 6270 CNRS, Mont Saint Aignan, France

<sup>3</sup>Université de Bretagne-Sud, Laboratoire de Biotechnologie et Chimie Marines, LBCM  
EA3884, Institut Universitaire Européen de la Mer, Lorient, France

<sup>4</sup>INRS-Institut Armand-Frappier, Laval, Québec, Canada

<sup>5</sup>Institute of Functional Interfaces, Karlsruhe Institute of Technology, Karlsruhe,  
Germany

Supplementary Figure 1

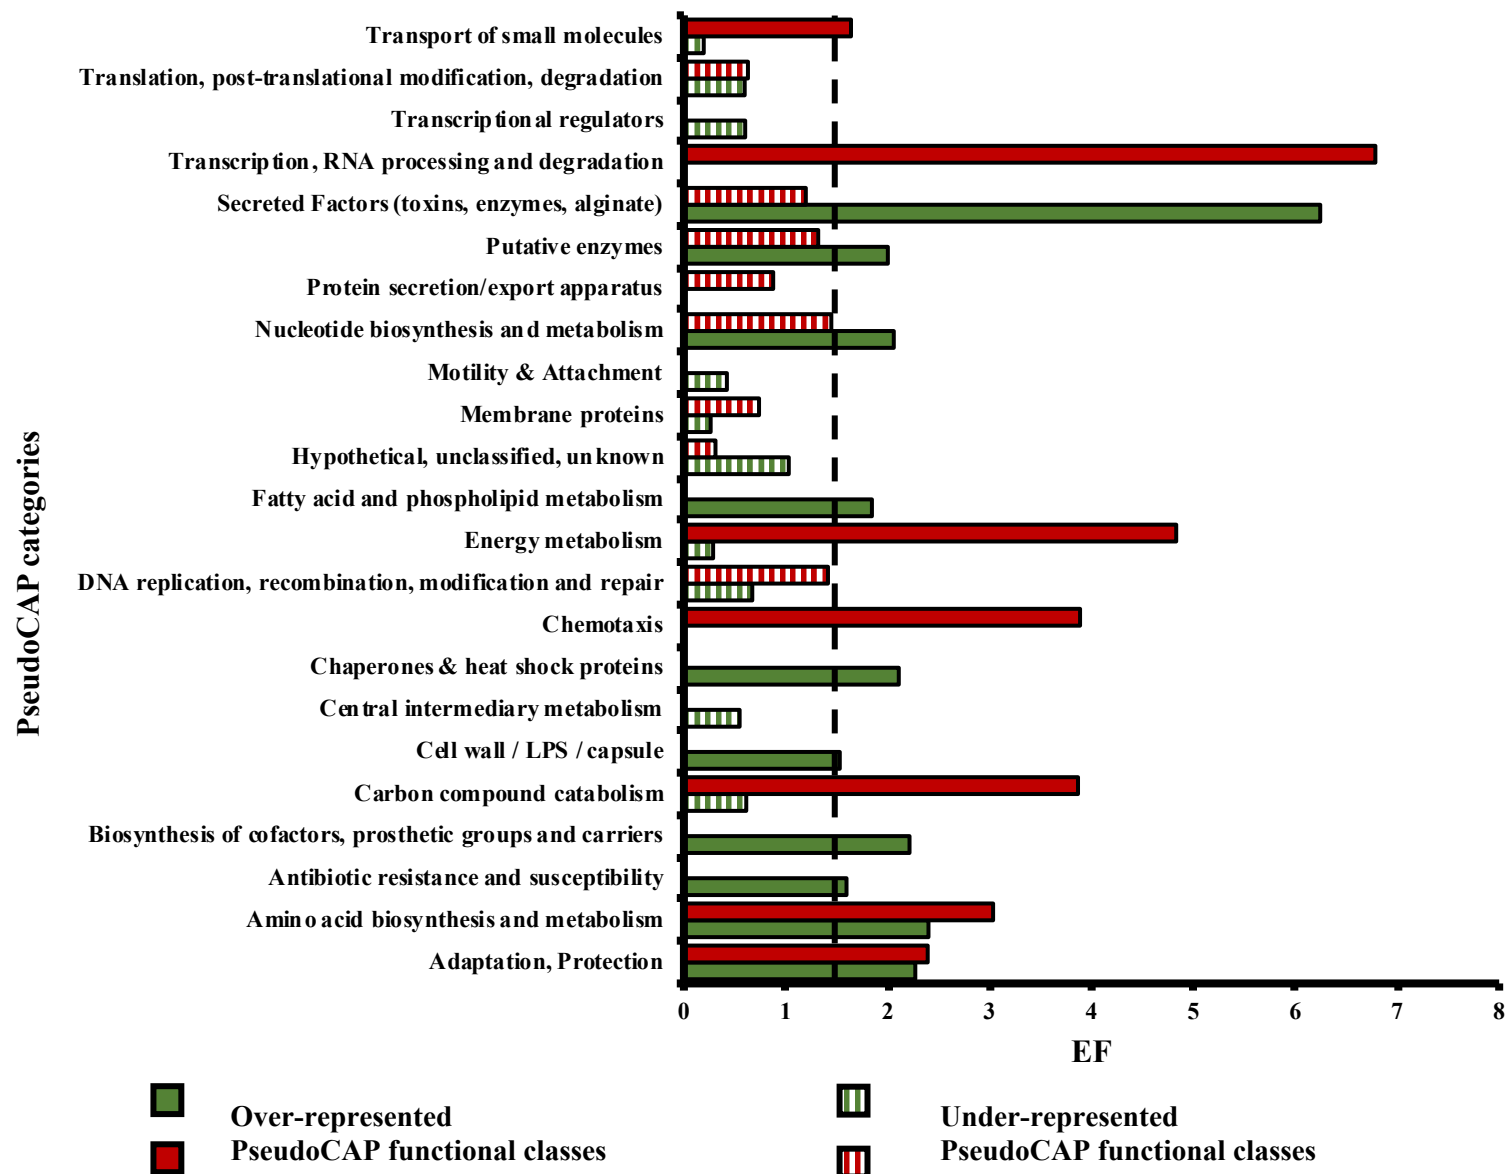

**Supplementary Figure 1** Functional classification of proteins that are over-represented (red and green bars) and under-represented (red and green striped-bars) in *P. aeruginosa* biofilm cultures exposed to sub-MIC of tobramycin. The PseudoCAP annotation ([www.pseudomonas.com](http://www.pseudomonas.com)) was used to categorize the members of the significantly differentially abundant proteins, and enrichment of specific classes of proteins relative to their distribution in PAO1 is displayed as the enrichment factor (EF).

**Supplementary Table 1** List of most differentially abundant proteins in tobramycin-enhanced biofilm formation of *P. aeruginosa*

| Locus Tag | Fold Change | Name  | Product Description                                                                               | PseudoCAP Class category                                                |
|-----------|-------------|-------|---------------------------------------------------------------------------------------------------|-------------------------------------------------------------------------|
| PA0080    | 2.7         | TssJ1 | TssJ1                                                                                             | Protein secretion/export apparatus; Hypothetical, unclassified, unknown |
| PA0082    | 2.8         | TssA1 | TssA1                                                                                             | Protein secretion/export apparatus; Hypothetical, unclassified, unknown |
| PA0083    | 2.5         | TssB1 | TssB1                                                                                             | Protein secretion/export apparatus; Hypothetical, unclassified, unknown |
| PA0084    | 2.1         | TssC1 | TssC1                                                                                             | Protein secretion/export apparatus; Hypothetical, unclassified, unknown |
| PA0085    | 2.3         | Hcp1  | Hcp1                                                                                              | Secreted Factors (toxins, enzymes, alginate)                            |
| PA0086    | 2.4         | TagJ1 | TagJ1                                                                                             | Protein secretion/export apparatus; Hypothetical, unclassified, unknown |
| PA0102    | 2.0         |       | probable carbonic anhydrase                                                                       | Adaptation, Protection; Central intermediary metabolism                 |
| PA0126    | 2.2         |       | hypothetical protein                                                                              | Hypothetical, unclassified, unknown                                     |
| PA0140    | 3.7         | AhpF  | alkyl hydroperoxide reductase subunit F                                                           | Adaptation, Protection                                                  |
| PA0141    | 4.9         |       | conserved hypothetical protein                                                                    | Hypothetical, unclassified, unknown                                     |
| PA0421    | 3.7         |       | hypothetical protein                                                                              | Putative enzymes                                                        |
| PA0578    | 3.9         |       | conserved hypothetical protein                                                                    | Hypothetical, unclassified, unknown                                     |
| PA0840    | 11.7        |       | probable oxidoreductase                                                                           | Putative enzymes                                                        |
| PA0848    | 2.0         | AhpB  | alkyl hydroperoxide reductase, AhpB                                                               | Adaptation, Protection; Putative enzymes                                |
| PA0849    | 5.4         | TrxB2 | thioredoxin reductase 2                                                                           | Nucleotide biosynthesis and metabolism                                  |
| PA0852    | 11.7        | CbpD  | chitin-binding protein CbpD precursor                                                             | Secreted Factors (toxins, enzymes, alginate)                            |
| PA0865    | 2.2         | Hpd   | 4-hydroxyphenylpyruvate dioxygenase                                                               | Amino acid biosynthesis and metabolism                                  |
| PA0872    | 4.6         | PhhA  | phenylalanine-4-hydroxylase                                                                       | Amino acid biosynthesis and metabolism                                  |
| PA0936    | 2.3         | LpxO2 | lipopolysaccharide biosynthetic protein LpxO2                                                     | Cell wall / LPS / capsule; Putative enzymes                             |
| PA0997    | 8.9         | PqsB  | PqsB                                                                                              | Biosynthesis of cofactors, prosthetic groups and carriers               |
| PA0998    | 5.8         | PqsC  | PqsC                                                                                              | Biosynthesis of cofactors, prosthetic groups and carriers               |
| PA0999    | 2.7         | PqsD  | 3-oxoacyl-[acyl-carrier-protein] synthase III                                                     | Biosynthesis of cofactors, prosthetic groups and carriers               |
| PA1023    | 2.1         |       | probable short-chain dehydrogenase                                                                | Putative enzymes                                                        |
| PA1043    | 4.8         |       | hypothetical protein                                                                              | Hypothetical, unclassified, unknown                                     |
| PA1094    | 2.8         | FliD  | flagellar capping protein FliD                                                                    | Cell wall / LPS / capsule; Motility & Attachment                        |
| PA1155    | 4.6         | NrdB  | NrdB, tyrosyl radical-harboring component of class Ia ribonucleotide reductase                    | Nucleotide biosynthesis and metabolism                                  |
| PA1162    | 2.6         | DapE  | succinyl-diaminopimelate desuccinylase                                                            | Amino acid biosynthesis and metabolism                                  |
| PA1324    | 5.6         |       | hypothetical protein                                                                              | Hypothetical, unclassified, unknown                                     |
| PA1430    | 2.3         | LasR  | transcriptional regulator LasR                                                                    | Adaptation, Protection; Transcriptional regulators                      |
| PA1544    | 2.1         | Anr   | transcriptional regulator Anr                                                                     | Transcriptional regulators                                              |
| PA1617    | 3.5         |       | probable AMP-binding enzyme                                                                       | Putative enzymes                                                        |
| PA1746    | 2.7         |       | hypothetical protein                                                                              | Hypothetical, unclassified, unknown                                     |
| PA1802    | 2.7         | ClpX  | ClpX                                                                                              | Cell wall / LPS / capsule; Chaperones & heat shock proteins             |
| PA1816    | 2.0         | DnaQ  | DNA polymerase III, epsilon chain                                                                 | Nucleotide biosynthesis and metabolism                                  |
| PA1901    | 6.8         | PhzC2 | phenazine biosynthesis protein PhzC                                                               | Secreted Factors (toxins, enzymes, alginate)                            |
| PA1902    | 10.2        | PhzD2 | phenazine biosynthesis protein PhzD                                                               | Secreted Factors (toxins, enzymes, alginate)                            |
| PA1904    | 4.0         | PhzF2 | probable phenazine biosynthesis protein                                                           | Secreted Factors (toxins, enzymes, alginate)                            |
| PA1905    | 8.5         | PhzG2 | probable pyridoxamine 5'-phosphate oxidase                                                        | Secreted Factors (toxins, enzymes, alginate)                            |
| PA1999    | 2.7         | DchA  | dehydrocarnitine CoA transferase, DchA                                                            | Amino acid biosynthesis and metabolism                                  |
| PA2000    | 2.7         | DchB  | dehydrocarnitine CoA transferase, DchB                                                            | Amino acid biosynthesis and metabolism                                  |
| PA2019    | 12.2        | MexX  | Resistance-Nodulation-Cell Division (RND) multidrug efflux membrane fusion protein MexX precursor | Antibiotic resistance and susceptibility; Transport of small molecules  |
| PA2020    | 6.4         | MexZ  | MexZ                                                                                              | Transcriptional regulators                                              |
| PA2069    | 2.6         |       | probable carbamoyl transferase                                                                    | Putative enzymes                                                        |
| PA2116    | 2.4         |       | conserved hypothetical protein                                                                    | Hypothetical, unclassified, unknown                                     |
| PA2134    | 43.0        |       | hypothetical protein                                                                              | Hypothetical, unclassified, unknown                                     |
| PA2171    | 2.4         |       | hypothetical protein                                                                              | Hypothetical, unclassified, unknown                                     |
| PA2195    | 20.6        | HcnC  | hydrogen cyanide synthase HcnC                                                                    | Central intermediary metabolism                                         |
| PA2204    | 3.2         |       | probable binding protein component of ABC transporter                                             | Transport of small molecules                                            |

|        |      |       |                                                            |                                                                                                         |
|--------|------|-------|------------------------------------------------------------|---------------------------------------------------------------------------------------------------------|
| PA2290 | 5.0  | Gcd   | glucose dehydrogenase                                      | Energy metabolism; Carbon compound catabolism                                                           |
| PA2300 | 2.0  | ChiC  | chitinase                                                  | Carbon compound catabolism                                                                              |
| PA2302 | 2.5  | AmbE  | AmbE                                                       | Putative enzymes; Secreted Factors (toxins, enzymes, alginate)                                          |
| PA2303 | 2.9  | AmbD  | AmbD                                                       | Secreted Factors (toxins, enzymes, alginate)                                                            |
| PA2304 | 5.5  | AmbC  | AmbC                                                       | Secreted Factors (toxins, enzymes, alginate)                                                            |
| PA2366 | 10.8 | HsiC3 | HsiC3                                                      | Hypothetical, unclassified, unknown                                                                     |
| PA2444 | 2.0  | GlyA2 | serine hydroxymethyltransferase                            | Amino acid biosynthesis and metabolism                                                                  |
| PA2446 | 2.3  | GcvH2 | glycine cleavage system protein H2                         | Amino acid biosynthesis and metabolism                                                                  |
| PA2491 | 2.6  | MexS  | MexS                                                       | Transcriptional regulators; Putative enzymes                                                            |
| PA2540 | 2.1  |       | conserved hypothetical protein                             | Hypothetical, unclassified, unknown                                                                     |
| PA2555 | 2.2  |       | probable AMP-binding enzyme                                | Putative enzymes                                                                                        |
| PA2582 | 2.3  |       | hypothetical protein                                       | Hypothetical, unclassified, unknown                                                                     |
| PA2587 | 8.6  | PqsH  | probable FAD-dependent monooxygenase                       | Biosynthesis of cofactors, prosthetic groups and carriers                                               |
| PA2592 | 3.3  |       | probable periplasmic spermidine/putrescine-binding protein | Transport of small molecules                                                                            |
| PA2622 | 7.5  | CspD  | cold-shock protein CspD                                    | Adaptation, Protection; Transcriptional regulators                                                      |
| PA2856 | 2.3  | TesA  | lysophospholipase A                                        | Fatty acid and phospholipid metabolism                                                                  |
| PA2939 | 11.6 |       | probable aminopeptidase                                    | Secreted Factors (toxins, enzymes, alginate)                                                            |
| PA2945 | 2.4  |       | conserved hypothetical protein                             | Biosynthesis of cofactors, prosthetic groups and carriers                                               |
| PA2971 | 2.1  |       | conserved hypothetical protein                             | Hypothetical, unclassified, unknown                                                                     |
| PA3062 | 2.7  | PeiC  | PeiC                                                       | Cell wall / LPS / capsule                                                                               |
| PA3126 | 2.0  | IbpA  | heat-shock protein IbpA                                    | Chaperones & heat shock proteins                                                                        |
| PA3141 | 3.1  | WbpM  | nucleotide sugar epimerase/dehydratase WbpM                | Cell wall / LPS / capsule; Putative enzymes; Membrane proteins                                          |
| PA3165 | 3.3  | HisC2 | histidinol-phosphate aminotransferase                      | Amino acid biosynthesis and metabolism                                                                  |
| PA3328 | 5.4  |       | probable FAD-dependent monooxygenase                       | Putative enzymes                                                                                        |
| PA3329 | 2.3  |       | hypothetical protein                                       | Hypothetical, unclassified, unknown                                                                     |
| PA3330 | 2.3  |       | probable short chain dehydrogenase                         | Putative enzymes                                                                                        |
| PA3331 | 3.7  |       | cytochrome P450                                            | Adaptation, Protection; Carbon compound catabolism                                                      |
| PA3332 | 2.0  |       | conserved hypothetical protein                             | Hypothetical, unclassified, unknown                                                                     |
| PA3333 | 3.2  | FabH2 | 3-oxoacyl-[acyl-carrier-protein] synthase III              | Fatty acid and phospholipid metabolism                                                                  |
| PA3460 | 2.1  |       | probable acetyltransferase                                 | Putative enzymes                                                                                        |
| PA3468 | 2.1  |       | conserved hypothetical protein                             | Hypothetical, unclassified, unknown                                                                     |
| PA3477 | 4.2  | RhIR  | transcriptional regulator RhIR                             | Transcriptional regulators                                                                              |
| PA3539 | 4.9  |       | conserved hypothetical protein                             | Hypothetical, unclassified, unknown                                                                     |
| PA3622 | 2.5  | RpoS  | sigma factor RpoS                                          | Transcriptional regulators                                                                              |
| PA3691 | 2.3  |       | hypothetical protein                                       | Hypothetical, unclassified, unknown                                                                     |
| PA3724 | 3.2  | LasB  | elastase LasB                                              | Secreted Factors (toxins, enzymes, alginate); Translation, post-translational modification, degradation |
| PA3792 | 2.0  | LeuA  | 2-isopropylmalate synthase                                 | Amino acid biosynthesis and metabolism                                                                  |
| PA3805 | 5.8  | PilF  | type 4 fimbrial biogenesis protein PilF                    | Motility & Attachment; Protein secretion/export apparatus                                               |
| PA3806 | 2.7  |       | conserved hypothetical protein                             | Hypothetical, unclassified, unknown                                                                     |
| PA3819 | 2.5  |       | conserved hypothetical protein                             | Membrane proteins                                                                                       |
| PA3846 | 7.5  |       | hypothetical protein                                       | Hypothetical, unclassified, unknown                                                                     |
| PA3887 | 3.9  | NhaP  | Na <sup>+</sup> /H <sup>+</sup> antiporter NhaP            | Membrane proteins; Transport of small molecules                                                         |
| PA3925 | 2.4  |       | probable acyl-CoA thiolase                                 | Putative enzymes                                                                                        |
| PA3945 | 4.8  |       | conserved hypothetical protein                             | Hypothetical, unclassified, unknown                                                                     |
| PA3996 | 4.1  | Lis   | lipoate synthase                                           | Biosynthesis of cofactors, prosthetic groups and carriers                                               |
| PA4129 | 3.2  |       | hypothetical protein                                       | Adaptation, Protection                                                                                  |
| PA4190 | 3.6  | PqsL  | probable FAD-dependent monooxygenase                       | Putative enzymes                                                                                        |
| PA4209 | 4.0  | PhzM  | probable phenazine-specific methyltransferase              | Putative enzymes                                                                                        |
| PA4211 | 2.4  | PhzB1 | probable phenazine biosynthesis protein                    | Secreted Factors (toxins, enzymes, alginate)                                                            |
| PA4217 | 3.2  | PhzS  | flavin-containing monooxygenase                            | Putative enzymes                                                                                        |
| PA4241 | 2.2  | RpsM  | 30S ribosomal protein S13                                  | Translation, post-translational modification, degradation                                               |
| PA4246 | 2.2  | RpsE  | 30S ribosomal protein S5                                   | Translation, post-translational modification, degradation                                               |
| PA4356 | 2.5  | XenB  | xenobiotic reductase                                       | Adaptation, Protection; Antibiotic resistance and susceptibility                                        |

|        |      |      |                                                       |                                                                                           |
|--------|------|------|-------------------------------------------------------|-------------------------------------------------------------------------------------------|
| PA4515 | 2.2  | PiuC | conserved hypothetical protein                        | Hypothetical, unclassified, unknown                                                       |
| PA4632 | 2.3  |      | hypothetical protein                                  | Hypothetical, unclassified, unknown                                                       |
| PA4762 | 2.1  | GrpE | heat shock protein GrpE                               | Chaperones & heat shock proteins; DNA replication, recombination, modification and repair |
| PA4778 | 10.5 | CueR | CueR                                                  | Transcriptional regulators                                                                |
| PA4931 | 2.1  | DnaB | replicative DNA helicase                              | DNA replication, recombination, modification and repair                                   |
| PA4963 | 2.2  |      | hypothetical protein                                  | Hypothetical, unclassified, unknown                                                       |
| PA5220 | 5.9  |      | hypothetical protein                                  | Hypothetical, unclassified, unknown                                                       |
| PA5279 | 2.0  |      | conserved hypothetical protein                        | Hypothetical, unclassified, unknown                                                       |
| PA5285 | 3.3  | SutA | SutA                                                  | Hypothetical, unclassified, unknown; Transcriptional regulators                           |
| PA5304 | 2.3  | DadA | D-amino acid dehydrogenase, small subunit             | Amino acid biosynthesis and metabolism; Energy metabolism                                 |
| PA5340 | 2.2  |      | hypothetical protein                                  | Hypothetical, unclassified, unknown                                                       |
| PA5400 | 5.6  |      | probable electron transfer flavoprotein alpha subunit | Energy metabolism                                                                         |
| PA5471 | 16.2 | ArmZ | ArmZ                                                  | Antibiotic resistance and susceptibility                                                  |
| PA5475 | 6.3  |      | hypothetical protein                                  | Hypothetical, unclassified, unknown                                                       |
| PA5481 | 2.5  |      | hypothetical protein                                  | Hypothetical, unclassified, unknown                                                       |
| PA5528 | 2.3  |      | hypothetical protein                                  | Membrane proteins                                                                         |
| PA5546 | 2.4  |      | conserved hypothetical protein                        | Putative enzymes                                                                          |

**Supplementary Table 2** List of less differentially abundant proteins in whole cell biofilm in *P. aeruginosa* exposed to tobramycin

| Locus Tag | Fold Change | Name  | Product Description                                           | PseudoCAP Class category                                                                          |
|-----------|-------------|-------|---------------------------------------------------------------|---------------------------------------------------------------------------------------------------|
| PA0004    | -2.2        | GyrB  | DNA gyrase subunit B                                          | DNA replication, recombination, modification and repair                                           |
| PA0041    | -2.2        |       | probable hemagglutinin                                        | Secreted Factors (toxins, enzymes, alginate)                                                      |
| PA0155    | -2.4        | PcaR  | transcriptional regulator PcaR                                | Carbon compound catabolism; Transcriptional regulators                                            |
| PA0413    | -3.5        | ChpA  | component of chemotactic signal transduction system           | Chemotaxis; Motility & Attachment; Two-component regulatory systems                               |
| PA0519    | -6.0        | NirS  | nitrite reductase precursor                                   | Energy metabolism                                                                                 |
| PA0743    | -2.4        |       | probable 3-hydroxyisobutyrate dehydrogenase                   | Carbon compound catabolism                                                                        |
| PA0782    | -2.2        | PutA  | proline dehydrogenase PutA                                    | Amino acid biosynthesis and metabolism                                                            |
| PA1135    | -2.1        | HchA  | conserved hypothetical protein                                | Hypothetical, unclassified, unknown                                                               |
| PA1174    | -4.1        | NapA  | periplasmic nitrate reductase protein NapA                    | Energy metabolism                                                                                 |
| PA1327    | -3.1        |       | probable protease                                             | Putative enzymes                                                                                  |
| PA1458    | -3.0        |       | probable two-component sensor                                 | Chemotaxis; Two-component regulatory systems                                                      |
| PA1562    | -3.8        | AcnA  | aconitate hydratase I                                         | Energy metabolism                                                                                 |
| PA1585    | -2.7        | SucA  | 2-oxoglutarate dehydrogenase (E1 subunit)                     | Amino acid biosynthesis and metabolism; Energy metabolism                                         |
| PA1737    | -2.5        |       | probable 3-hydroxyacyl-CoA dehydrogenase                      | Putative enzymes                                                                                  |
| PA1863    | -3.7        | ModA  | molybdate-binding periplasmic protein precursor ModA          | Transport of small molecules                                                                      |
| PA2147    | -5.3        | KatE  | catalase HP11                                                 | Adaptation, Protection                                                                            |
| PA2158    | -3.0        |       | probable alcohol dehydrogenase (Zn-dependent)                 | Putative enzymes                                                                                  |
| PA2160    | -3.0        |       | probable glycosyl hydrolase                                   | Putative enzymes                                                                                  |
| PA2164    | -2.0        |       | probable glycosyl hydrolase                                   | Putative enzymes                                                                                  |
| PA2323    | -2.1        | GapN  | GapN                                                          | Carbon compound catabolism                                                                        |
| PA2642    | -2.4        | NuoG  | NADH dehydrogenase I chain G                                  | Energy metabolism                                                                                 |
| PA2699    | -2.1        |       | hypothetical protein                                          | Hypothetical, unclassified, unknown                                                               |
| PA2951    | -2.2        | EtfA  | electron transfer flavoprotein alpha-subunit                  | Energy metabolism                                                                                 |
| PA2976    | -2.2        | Rne   | ribonuclease E                                                | Transcription, RNA processing and degradation                                                     |
| PA3083    | -2.9        | PepN  | aminopeptidase N                                              | Translation, post-translational modification, degradation                                         |
| PA3115    | -2.7        | FimV  | Motility protein FimV                                         | Membrane proteins; Motility & Attachment                                                          |
| PA3195    | -2.2        | GapA  | glyceraldehyde 3-phosphate dehydrogenase                      | Carbon compound catabolism; Energy metabolism                                                     |
| PA3415    | -3.0        |       | probable dihydrolipoamide acetyltransferase                   | Energy metabolism                                                                                 |
| PA3416    | -3.5        |       | probable pyruvate dehydrogenase E1 component, beta chain      | Energy metabolism                                                                                 |
| PA3417    | -3.7        |       | probable pyruvate dehydrogenase E1 component, alpha subunit   | Energy metabolism                                                                                 |
| PA3529    | -2.8        |       | alkylhydroperoxide reductase C                                | Adaptation, Protection; Putative enzymes                                                          |
| PA3763    | -3.5        | PurL  | phosphoribosylformylglycinamide synthase                      | Nucleotide biosynthesis and metabolism                                                            |
| PA3790    | -2.5        | OprC  | Putative copper transport outer membrane porin OprC precursor | Transport of small molecules                                                                      |
| PA3987    | -2.2        | LeuS  | leucyl-tRNA synthetase                                        | Amino acid biosynthesis and metabolism; Translation, post-translational modification, degradation |
| PA4221    | -5.0        | FptA  | Fe(III)-pyochelin outer membrane receptor precursor           | Transport of small molecules                                                                      |
| PA4222    | -4.6        |       | probable ATP-binding component of ABC transporter             | Transport of small molecules                                                                      |
| PA4223    | -4.9        | PchH  | probable ATP-binding component of ABC transporter             | Membrane proteins; Transport of small molecules                                                   |
| PA4403    | -3.0        | SecA  | secretion protein SecA                                        | Protein secretion/export apparatus                                                                |
| PA4500    | -2.4        | DppA3 | probable binding protein component of ABC transporter         | Transport of small molecules                                                                      |

|        |      |       |                                                               |                                                                                                   |
|--------|------|-------|---------------------------------------------------------------|---------------------------------------------------------------------------------------------------|
| PA4501 | -3.4 | OpdD  | Glycine-glutamate dipeptide porin OpdP                        | Membrane proteins; Transport of small molecules                                                   |
| PA4502 | -3.4 | DppA4 | probable binding protein component of ABC transporter         | Transport of small molecules                                                                      |
| PA4560 | -3.5 | IleS  | isoleucyl-tRNA synthetase                                     | Amino acid biosynthesis and metabolism; Translation, post-translational modification, degradation |
| PA4656 | -2.2 |       | conserved hypothetical protein                                | Hypothetical, unclassified, unknown                                                               |
| PA4675 | -2.2 | ChtA  | ChtA                                                          | Transport of small molecules                                                                      |
| PA4733 | -3.2 | AcsB  | acetyl-coenzyme A synthetase                                  | Carbon compound catabolism; Central intermediary metabolism                                       |
| PA4735 | -2.9 |       | hypothetical protein                                          | Hypothetical, unclassified, unknown                                                               |
| PA4740 | -2.4 | Pnp   | polyribonucleotide nucleotidyltransferase                     | Transcription, RNA processing and degradation                                                     |
| PA4756 | -2.0 | CarB  | carbamoylphosphate synthetase large subunit                   | Amino acid biosynthesis and metabolism; Nucleotide biosynthesis and metabolism                    |
| PA4910 | -2.9 |       | branched chain amino acid ABC transporter ATP binding protein | Transport of small molecules                                                                      |
| PA4915 | -2.4 |       | probable chemotaxis transducer                                | Adaptation, Protection; Chemotaxis                                                                |
| PA4937 | -3.5 | Rnr   | exoribonuclease RNase R                                       | Transcription, RNA processing and degradation                                                     |
| PA5015 | -2.7 | AceE  | pyruvate dehydrogenase                                        | Amino acid biosynthesis and metabolism; Energy metabolism                                         |
| PA5168 | -3.3 | DctQ  | DctQ                                                          | Membrane proteins; Transport of small molecules                                                   |
| PA5373 | -2.3 | BetB  | betaine aldehyde dehydrogenase                                | Adaptation, Protection; Amino acid biosynthesis and metabolism                                    |
| PA5506 | -2.7 |       | hypothetical protein                                          | Hypothetical, unclassified, unknown                                                               |
| PA5522 | -2.4 | PauA6 | Glutamylpolyamine synthetase                                  | Carbon compound catabolism; Putative enzymes                                                      |



**Supplementary Table 3** HAQs production in biofilm cultures exposed or not to tobramycin of  $\Delta pqsA$  and its isogenic parent strain H103

| Strain                              | Concentration <sup>§</sup><br>( $\mu\text{g}\cdot\Gamma^1$ of whole biofilm suspension) |                                    |                                     |
|-------------------------------------|-----------------------------------------------------------------------------------------|------------------------------------|-------------------------------------|
|                                     | HHQ                                                                                     | PQS                                | HQNO                                |
| <b>H103</b>                         | 82.196 $\pm$ 8.572                                                                      | 255.323 $\pm$ 22.474               | 184.568 $\pm$ 9.710                 |
| <b>H103-TOB</b>                     | 121.156 $\pm$ 2.098 <sup>★</sup>                                                        | 947.844 $\pm$ 17.395 <sup>★★</sup> | 313.187 $\pm$ 4.129 <sup>★★</sup>   |
| <b><math>\Delta pqsA</math></b>     | 0.058 $\pm$ 0.005 <sup>★★###</sup>                                                      | 0.794 $\pm$ 0.102 <sup>★★###</sup> | 0.148 $\pm$ 0.027 <sup>★★★###</sup> |
| <b><math>\Delta pqsA</math>-TOB</b> | 0.059 $\pm$ 0.017 <sup>★★NS</sup>                                                       | 1.991 $\pm$ 0.356 <sup>★★★‡</sup>  | 0.282 $\pm$ 0.076 <sup>★★★NS</sup>  |

§ Concentrations of each HAQ in the whole biofilm suspension of the indicated strains grown with or without tobramycin as indicated, were determined by LC-MS/MS and normalized by culture density as described in the Methods section.

Significant differences were determined by a two-tailed *t*-test.

★ indicate the following p values when comparing the H103 wild type strain with tobramycin,  $\Delta pqsA$  mutant without tobramycin, and  $\Delta pqsA$  mutant with tobramycin, to the wild type strain: ★p < 0.05; ★★p < 0.01; ★★★ p < 0.001

‡ indicate the following p values when comparing the  $\Delta pqsA$  mutant with and without tobramycin supplementation: ‡p < 0.05

# indicate the following p values when comparing the  $\Delta pqsA$  mutant with tobramycin to the H103 wild type strain with tobramycin : ### p < 0.001

NS (Not Significant) p $\geq$ 0.05

**Supplementary Table 4** Bacterial strains and plasmids used in this study

| Strain or plasmid                          | Genotype or relevant characteristics                                                                         | Reference or source           |
|--------------------------------------------|--------------------------------------------------------------------------------------------------------------|-------------------------------|
| <i>Pseudomonas aeruginosa</i> PAO1 strains |                                                                                                              |                               |
| H103                                       | Wild-type strain; prototroph derivative of PAO1                                                              | Hancock and Carey, 1979       |
| $\Delta pqsA::Gmlox$                       | PAO1 H103 $\Delta pqsA::Gmlox$ ; Gm <sup>R</sup>                                                             | This study                    |
| $\Delta pqsA$                              | PAO1 H103 $\Delta pqsA::lox$                                                                                 | This study                    |
| $\Delta prrF::Gmlox$                       | PAO1 H103 $\Delta prrF::Gmlox$ ; Gm <sup>R</sup>                                                             | This study                    |
| $\Delta prrF$                              | PAO1 H103 $\Delta prrF::lox$                                                                                 | This study                    |
| <i>Escherichia coli</i> strains            |                                                                                                              |                               |
| TOP10                                      | Competent cells used as cloning host                                                                         | Invitrogen                    |
| S17.1                                      | <i>recA pro</i> (RP4-2Tet::Mu Kan::Tn7), donor and helper strain for conjugation                             | Simon et al., 1983            |
| Plasmids                                   |                                                                                                              |                               |
| pEX100Tlink                                | pUC19-based gene replacement vector with MCS <sup>a</sup> , sacB; Ap <sup>R</sup>                            | Qu  n  e <i>et al.</i> , 2005 |
| pUCGMlox                                   | pUC18-based vector containing the <i>lox</i> flanked <i>aacC1</i> gene; Ap <sup>R</sup> , Gm <sup>R</sup>    | Qu  n  e <i>et al.</i> , 2005 |
| pCM157                                     | <i>cre</i> expression vector; Tc <sup>R</sup>                                                                | Marx and Lidstrom, 2002       |
| pEX:: $\Delta pqsA$                        | pEX100Tlink containing 5' and 3' flanking sequence of <i>pqsA</i> gene; Ap <sup>R</sup>                      | This study                    |
| pEX:: $\Delta pqsA::Gmlox$                 | pEX100Tlink containing 5' and 3' flanking sequence of <i>pqsA::Gmlox</i> ; Ap <sup>R</sup> , Gm <sup>R</sup> | This study                    |
| pEX:: $\Delta prrF$                        | pEX100Tlink containing 5' and 3' flanking sequence of <i>prpF1,F2</i> gene; Ap <sup>R</sup>                  | This study                    |
| pEX:: $\Delta prrF::Gmlox$                 | pEX100Tlink containing 5' and 3' flanking sequence of <i>prpF::Gmlox</i> ; Ap <sup>R</sup> , Gm <sup>R</sup> | This study                    |

<sup>a</sup>, multiple cloning site

<sup>R</sup>, antibiotic resistance

*E. coli* strains were grown in the presence of ampicillin (Ap; 100  $\mu\text{g.ml}^{-1}$ ), gentamicin (Gm; 15  $\mu\text{g.ml}^{-1}$ ) or tetracycline (Tc; 10  $\mu\text{g.ml}^{-1}$ ).

*P. aeruginosa* strains were grown in LB liquid medium in the presence of carbenicillin (Cb; 300  $\mu\text{g.ml}^{-1}$ ), Gm (30  $\mu\text{g.ml}^{-1}$ ), or Tc (125  $\mu\text{g.ml}^{-1}$ )

or on LB agar medium containing Cb (600  $\mu\text{g.ml}^{-1}$ ), Gm (100  $\mu\text{g.ml}^{-1}$ ), or Tc (250  $\mu\text{g.ml}^{-1}$ )

## Supplementary References

Hancock, R. E. W. & Carey, A. M. Outer membrane of *Pseudomonas aeruginosa*: Heat- and 2-mercaptoethanol-modifiable proteins. *J. Bacteriol.* **140**, 902–910 (1979).

Marx, C. J. & Lidstrom, M. E. Broad-host-range *cre-lox* system for antibiotic marker recycling in Gram-negative bacteria. *BioTechniques* **33**, 1062–1067 (2002).

Qu  n  e, L., Lamotte, D. & Polack, B. Combined *sacB*-based negative selection and *cre-lox* antibiotic marker recycling for efficient gene deletion in *Pseudomonas aeruginosa*. *BioTechniques* **38**, 63–67 (2005).

Simon, R., Prierer, U. & P  hler, A. A broad host range mobilization system for in vivo genetic engineering: Transposon mutagenesis in Gram negative bacteria. *Bio/Technology* **1**, 784–791 (1983).

**Supplementary Table 5** List of primers used in this study

| Gene name                                | Sequence (5' > 3') <sup>a</sup>              | Length |
|------------------------------------------|----------------------------------------------|--------|
| Construction of the <i>pqsA</i> mutant   |                                              |        |
| pqsA-SacI-F                              | taataa- <b>GAGCTC</b> -CTGCACGGCTATTTCCGTAT  | 32     |
| pqsA-XbaI-R                              | taataa- <b>TCTAGA</b> -CAGAACGTTCCCTCTTCAGC  | 32     |
| pqsA-XbaI-F                              | taataa- <b>TCTAGA</b> -CATGTTGATTCAGGCTGTGG  | 32     |
| pqsA-HindIII-R                           | taataa- <b>AAGCTT</b> -CGCTGCCAGTTTGACCTTAT  | 32     |
| Construction of the <i>prfF</i> mutant   |                                              |        |
| prfF-EcoRI-F                             | taataa- <b>GAATTC</b> -TGGACGTTTCGTACCTCCTCT | 32     |
| prfF-XbaI-R                              | taataa- <b>TCTAGA</b> -TTTCGCCAAACTTTTCTGCT  | 32     |
| prfF-XbaI-F                              | taataa- <b>TCTAGA</b> -TTCCTTCAACGTGCCTTCTT  | 32     |
| prfF-HindIII-R                           | taataa- <b>AAGCTT</b> -TGTTTCGCTTTCTGTCTGCTG | 32     |
| Quantification of mRNA levels by RT-qPCR |                                              |        |
| <i>feoB</i> -F                           | GATCTTCATCGACGGCATCCAGTG                     | 24     |
| <i>feoB</i> -R                           | CAGCGAGAGGAACAGGTACATCA                      | 23     |
| <i>hasI</i> -F                           | TGGATGCCGATGCGCTTG                           | 18     |
| <i>hasI</i> -R                           | CAGCGGGAATCCTCGAGT                           | 18     |
| <i>phuR</i> -F                           | AGCCACTCCTGGTTGACCTC                         | 20     |
| <i>phuR</i> -R                           | CGTAGTTCAGCCCAGCTTG                          | 20     |
| <i>prfF</i> -F                           | GCGAGGCCAGCAGGTAAG                           | 18     |
| <i>prfF</i> -R                           | CGTGATTAGCCTGATGAGGAGAT                      | 23     |
| <i>pvdH</i> -F                           | CAGCACCATCCTGTCGTTCCA                        | 21     |
| <i>pvdH</i> -R                           | GCAGGTTGCGCTTGACCC                           | 18     |
| <i>pvdS</i> -F                           | GGAACAACCTGTCTACCCGCA                        | 20     |
| <i>pvdS</i> -R                           | GTAGCTGAGCTGTGCCTTGA                         | 20     |
| <i>rpoD</i> -F                           | AGGCCGTGAGCAGGGATAC                          | 19     |
| <i>rpoD</i> -R                           | TCCCCATGTCGTTGATCATG                         | 20     |
| <i>16S</i> -F                            | AACCTGGGAACCTGCATCCAA                        | 20     |
| <i>16S</i> -R                            | CTTCGCCACTGGTGTTCCTT                         | 20     |

<sup>a</sup>All the primers used in this study were synthesized by Eurogentec and are based on *P. aeruginosa* PAO1 genome sequence (<http://www.pseudomonas.com>). Bold nucleotides indicate restriction endonuclease sites inserted within primer sequences.
